# Supplementary material
Source: ML conference proceedings conference paper supplement (https://openreview.net/forum?id=j6AIRRxwbU)
Supplement: supplementary_material [file attachment]

# Qualitative Results

Mesh renderings of HMR2.0 vs DeformMR on 3DPW & RICH

(3DPW)

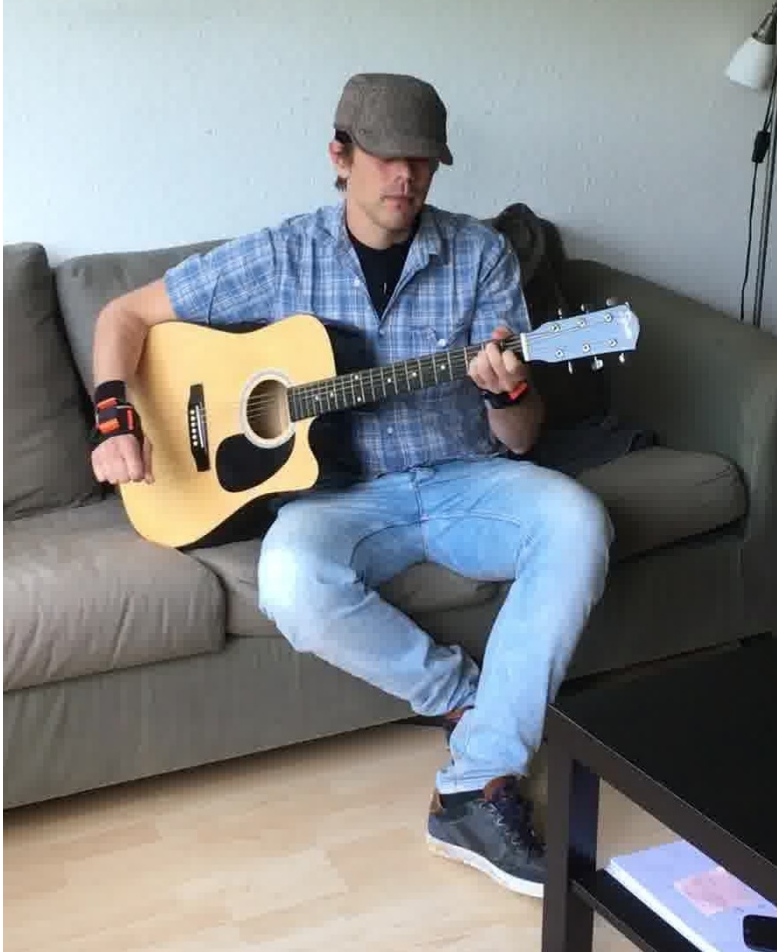

Original

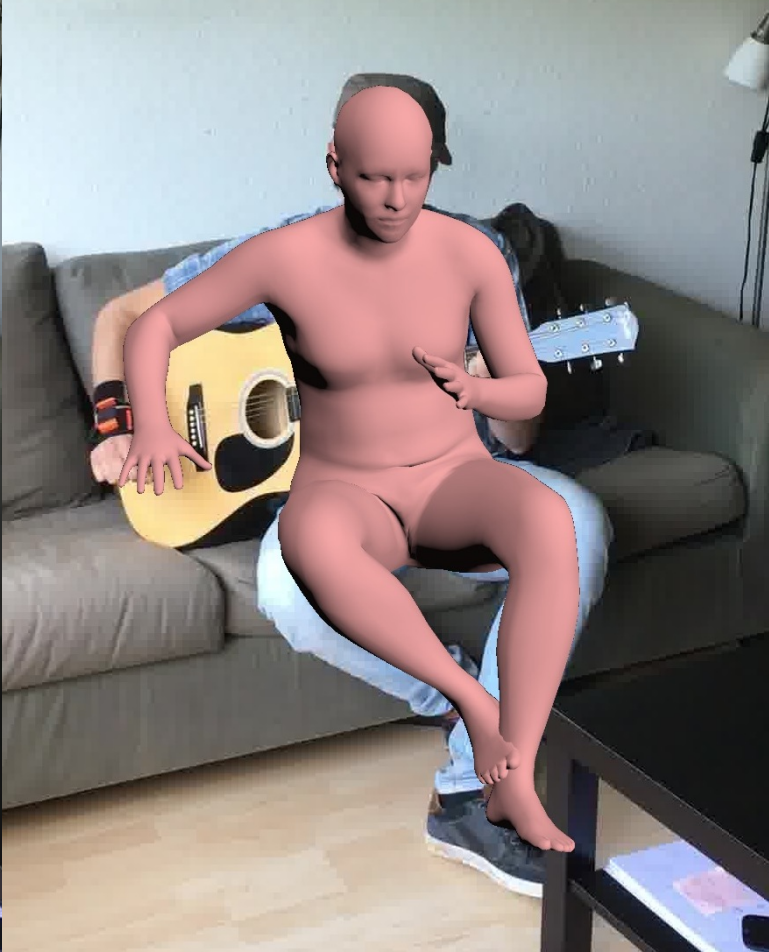

HMR2.0

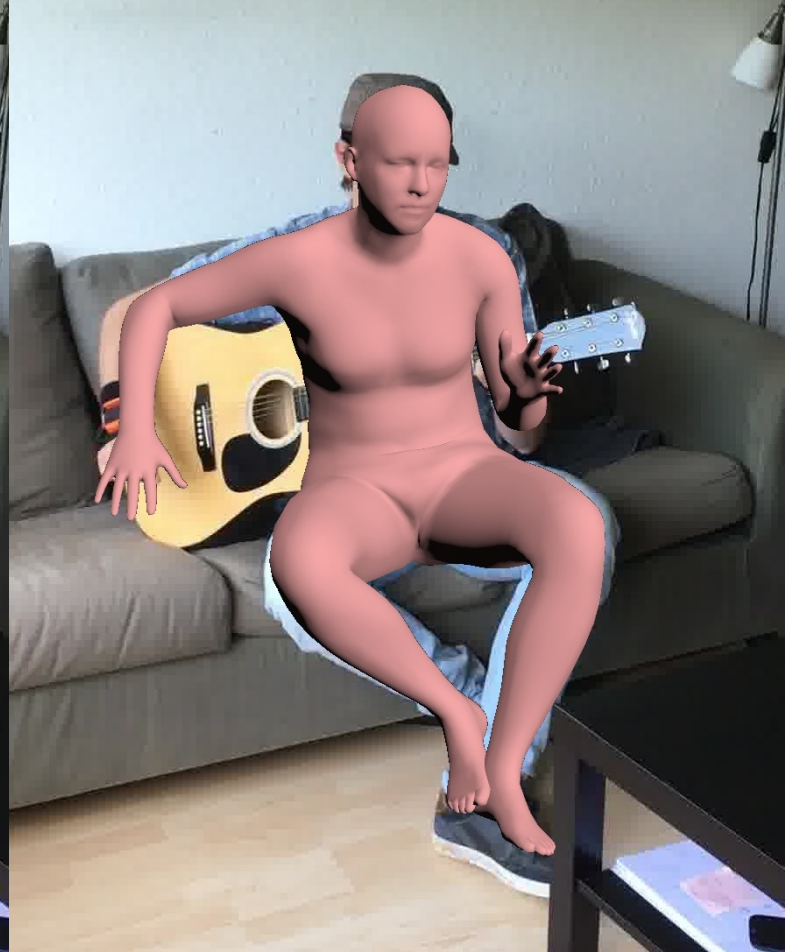

DeformHMR

(3DPW)

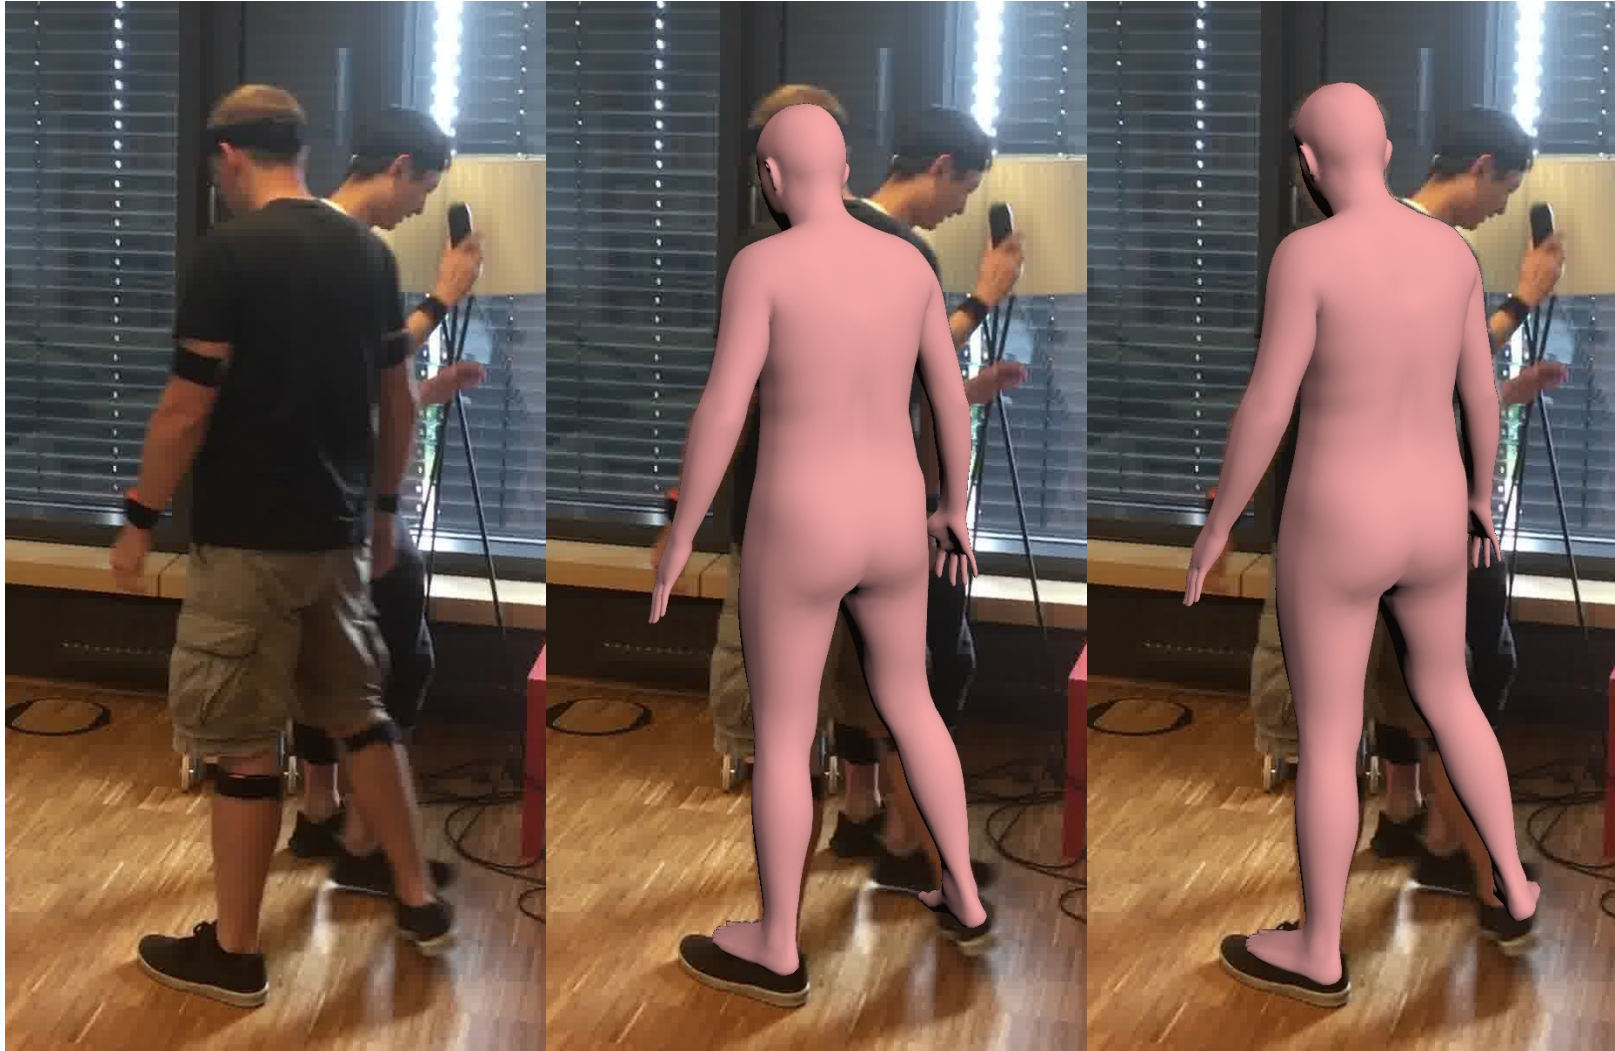

Original

HMR2.0

DeforHMR



(3DPW)

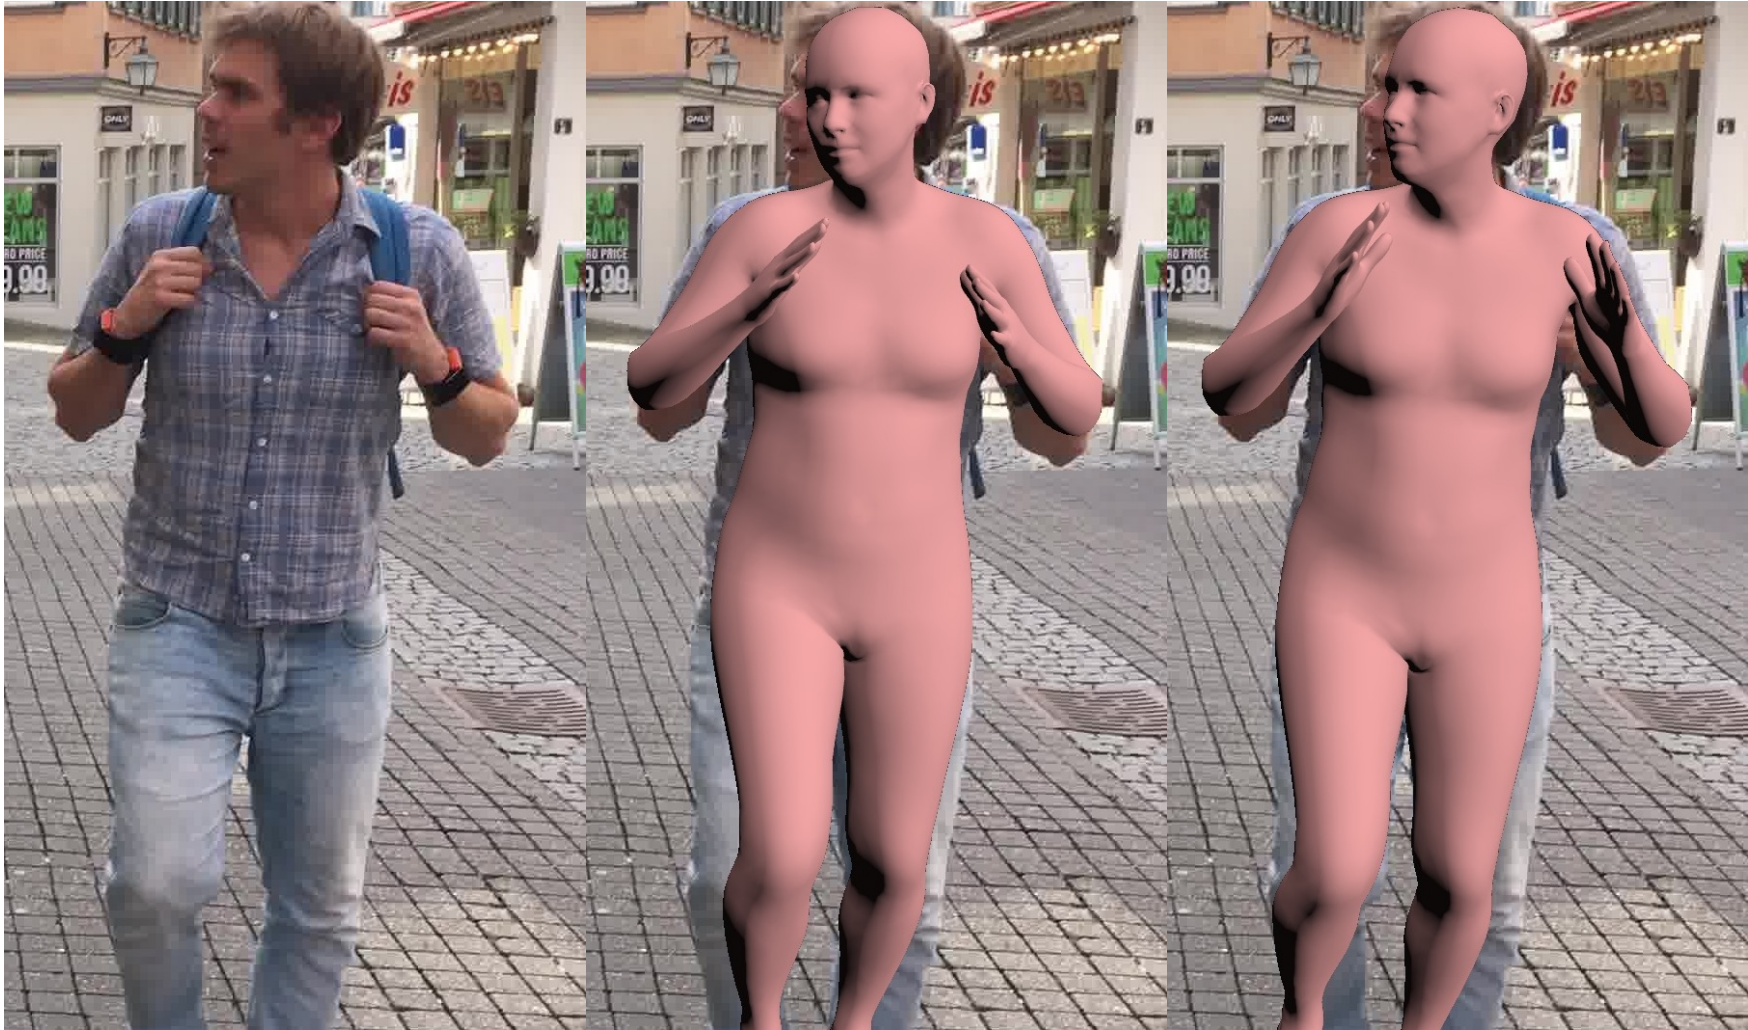

Original

HMR2.0

DeforHMR



(3DPW)

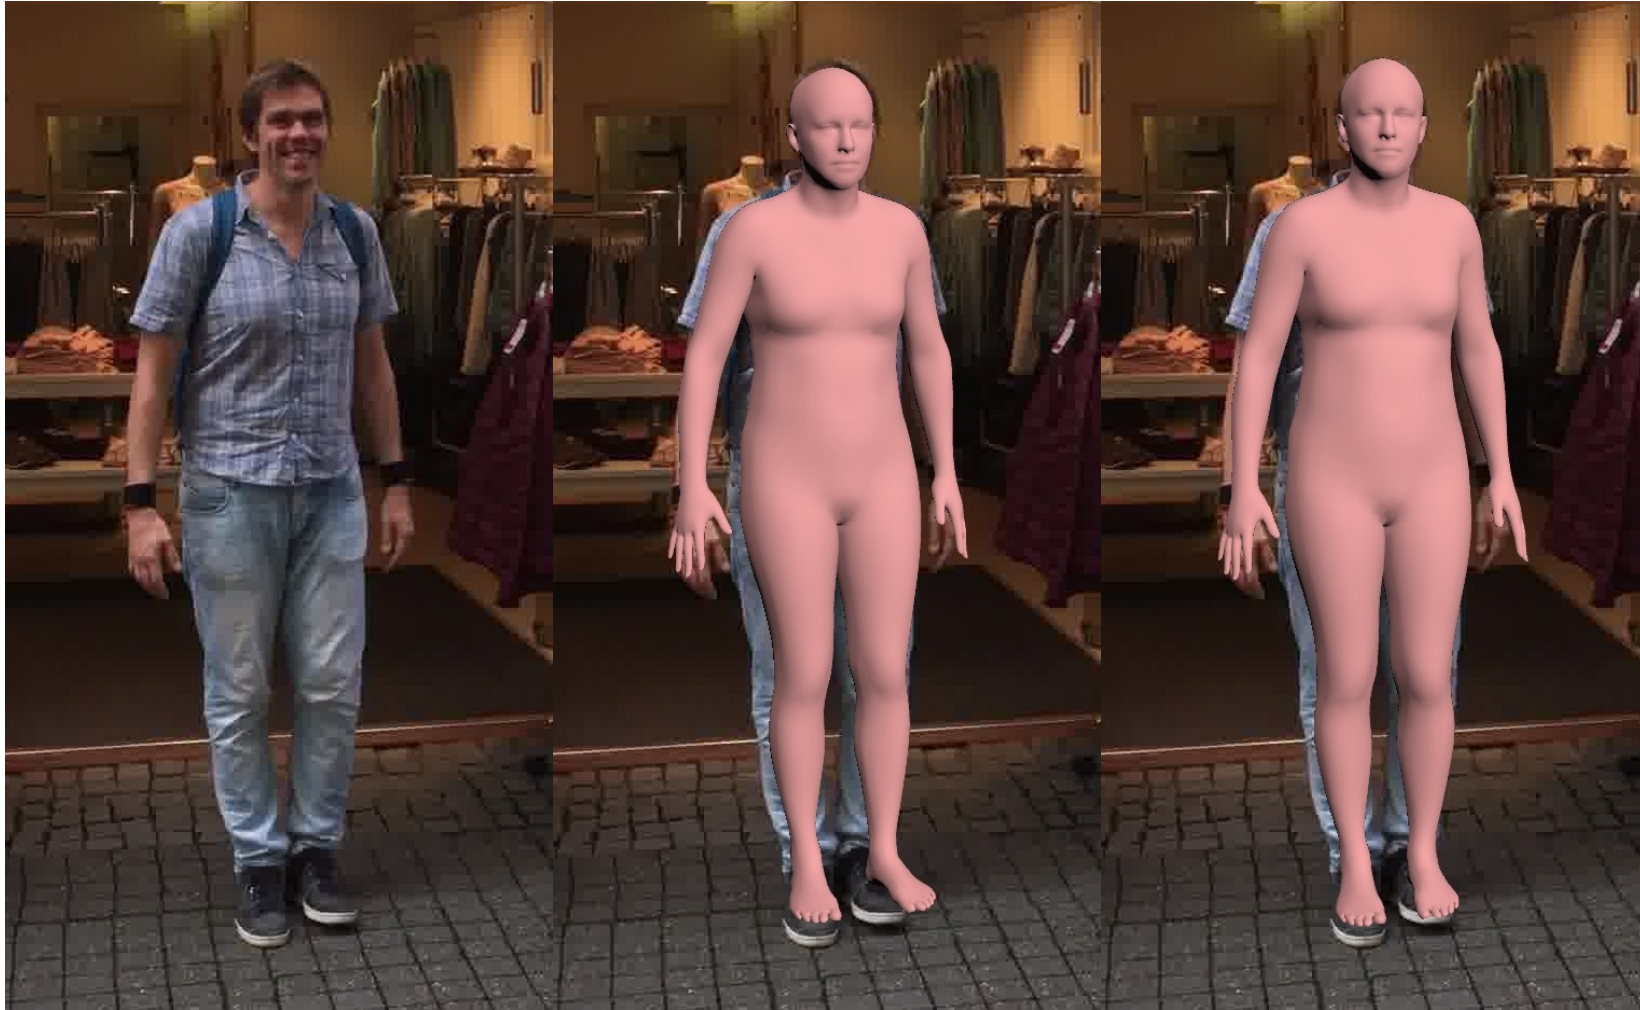

Original

HMR2.0

DeforHMR

(3DPW)

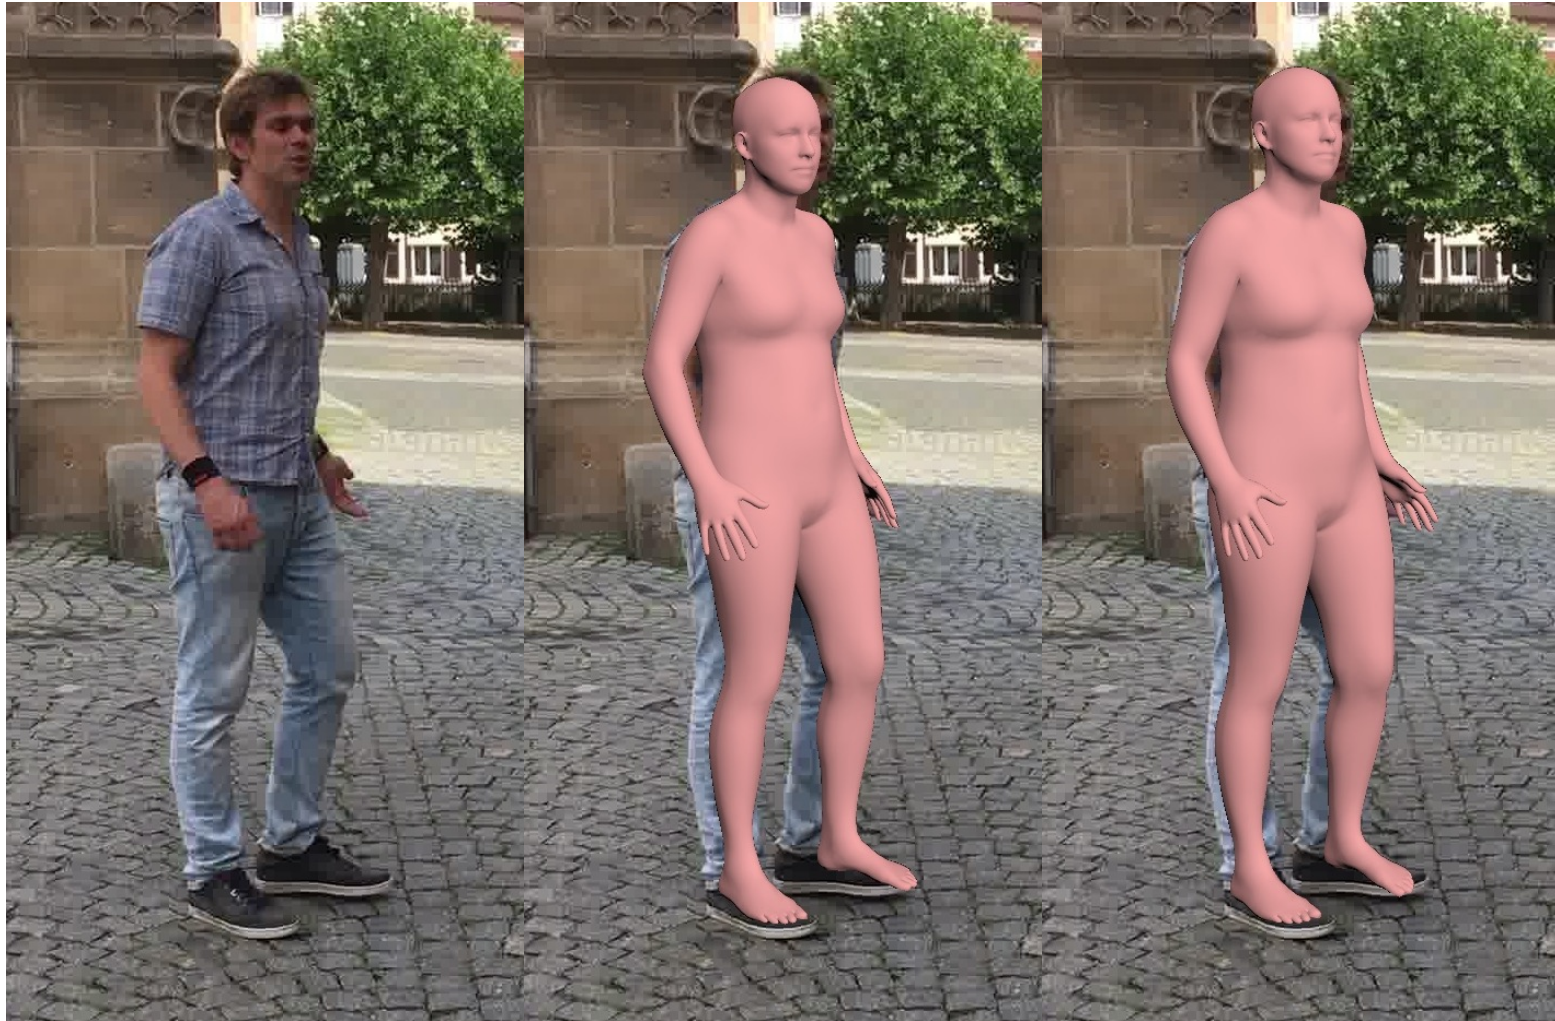

Original

HMR2.0

DeforHMR

(3DPW)

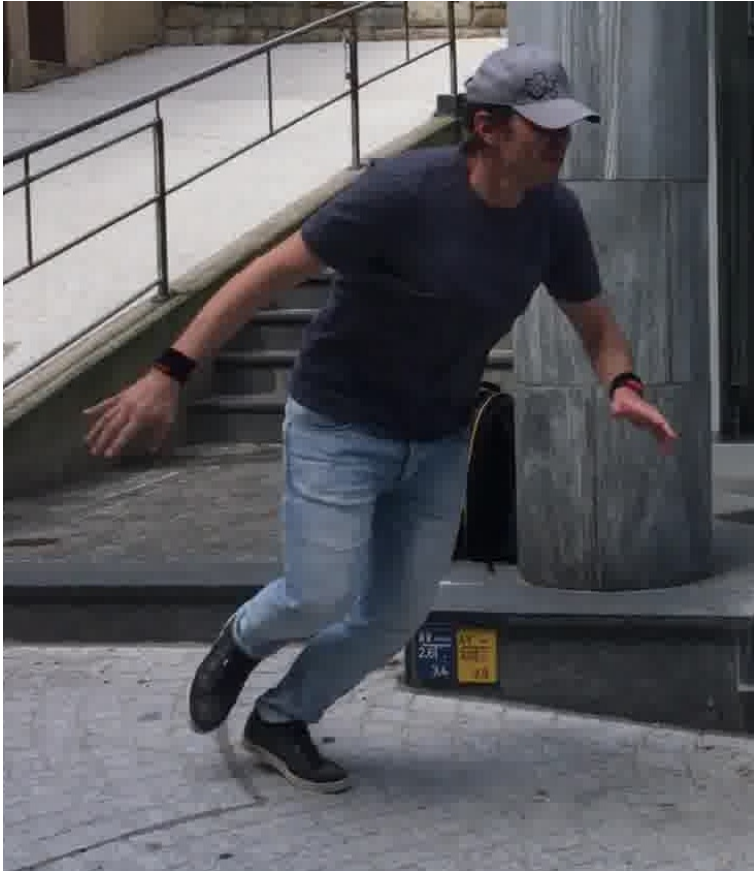

Original

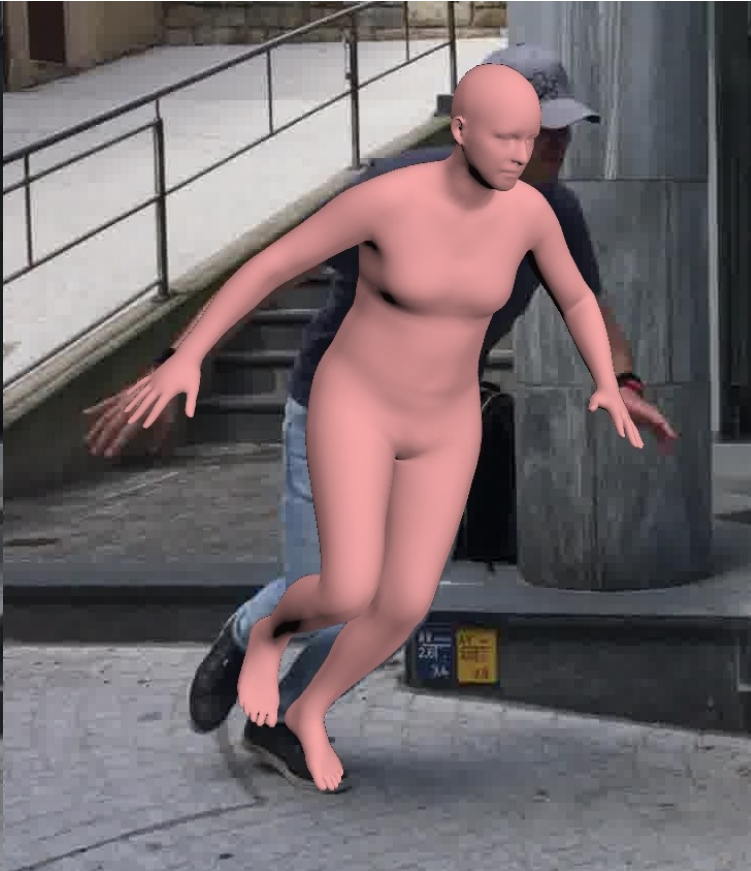

HMR2.0

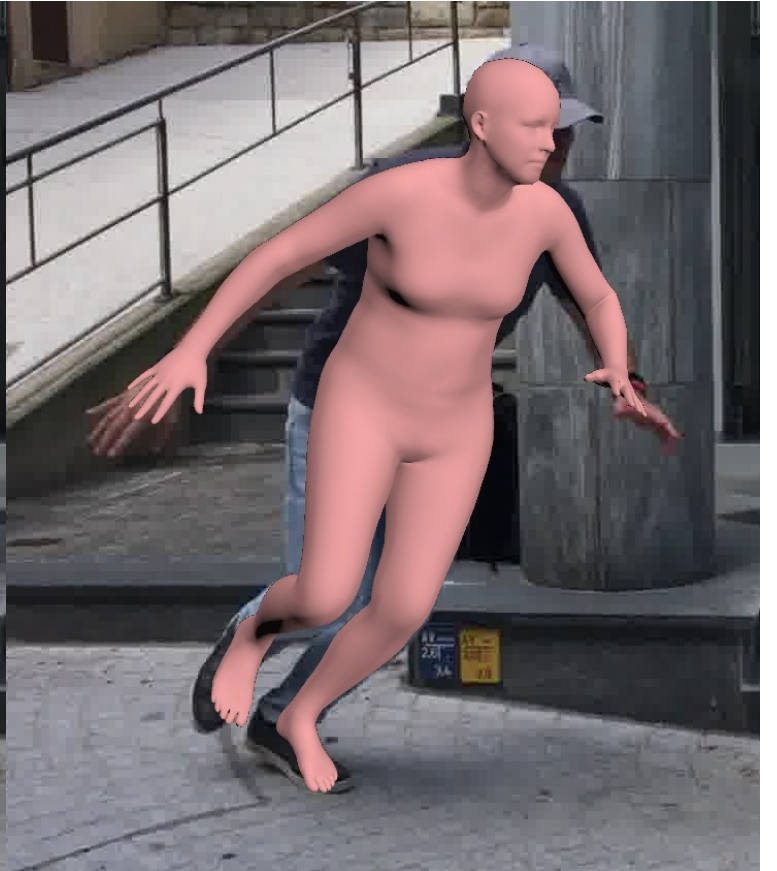

DeformHMR



(3DPW)

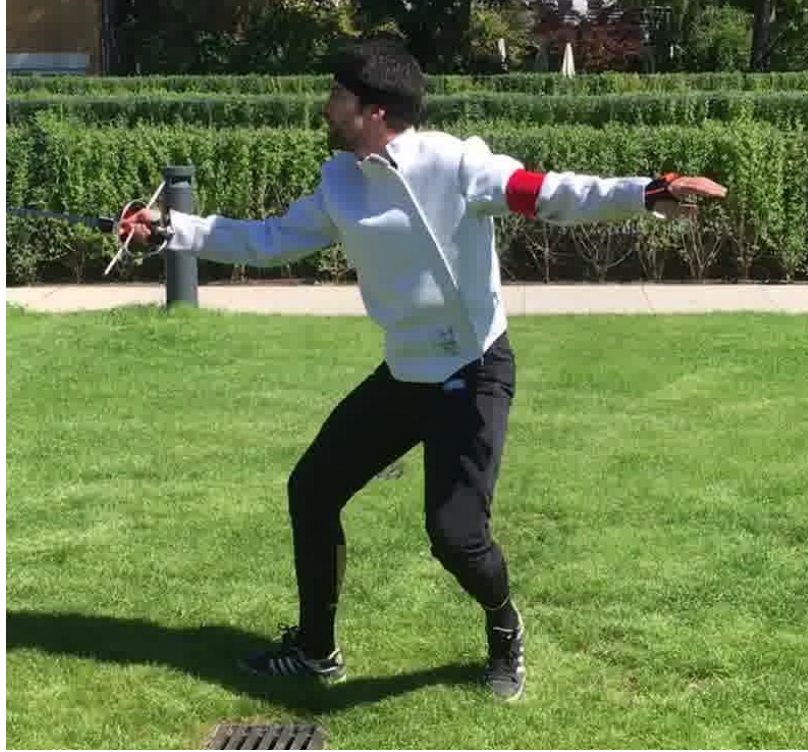

Original

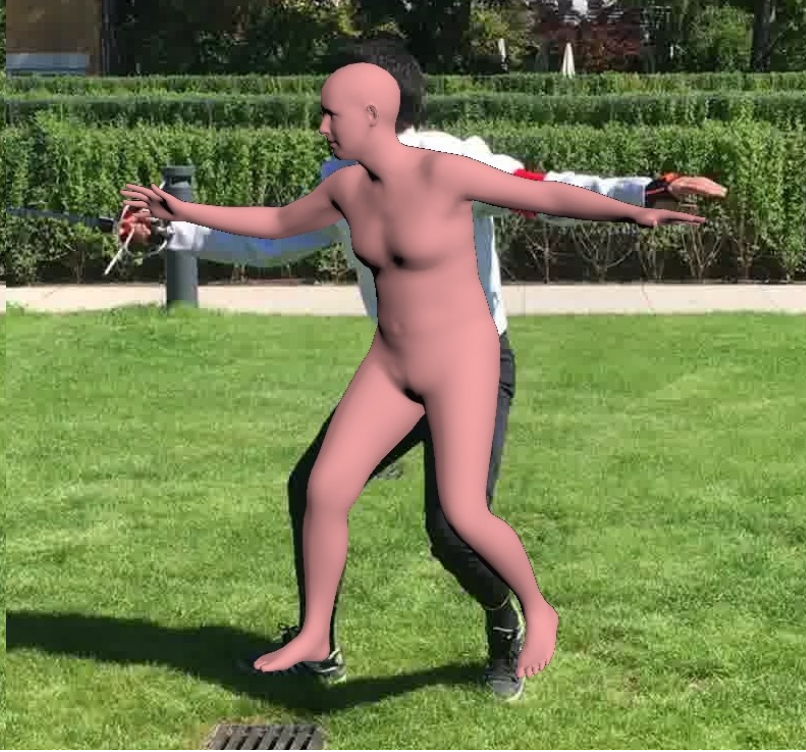

HMR2.0

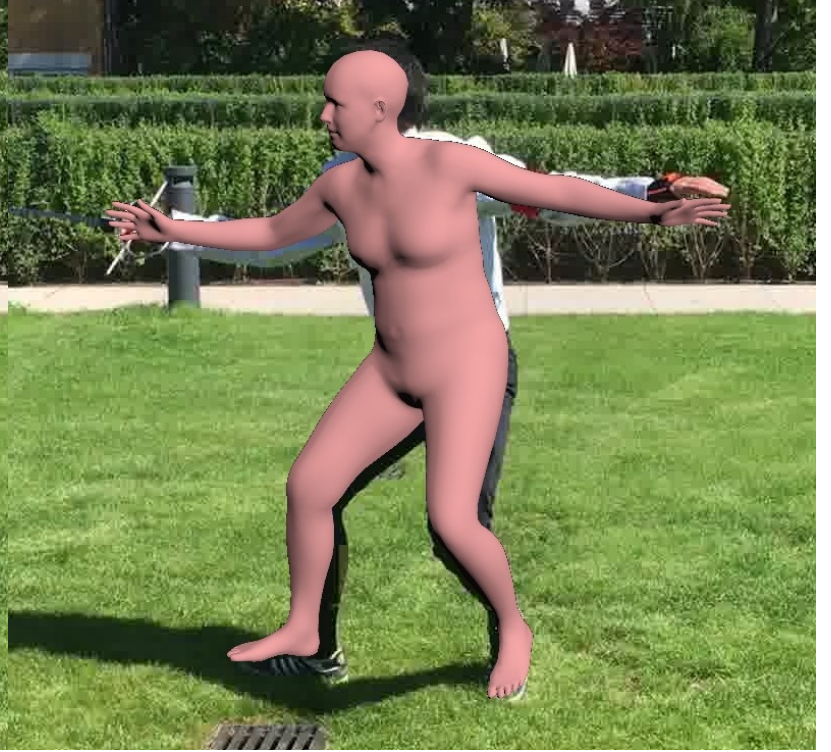

DeforHMR

# (RICH)

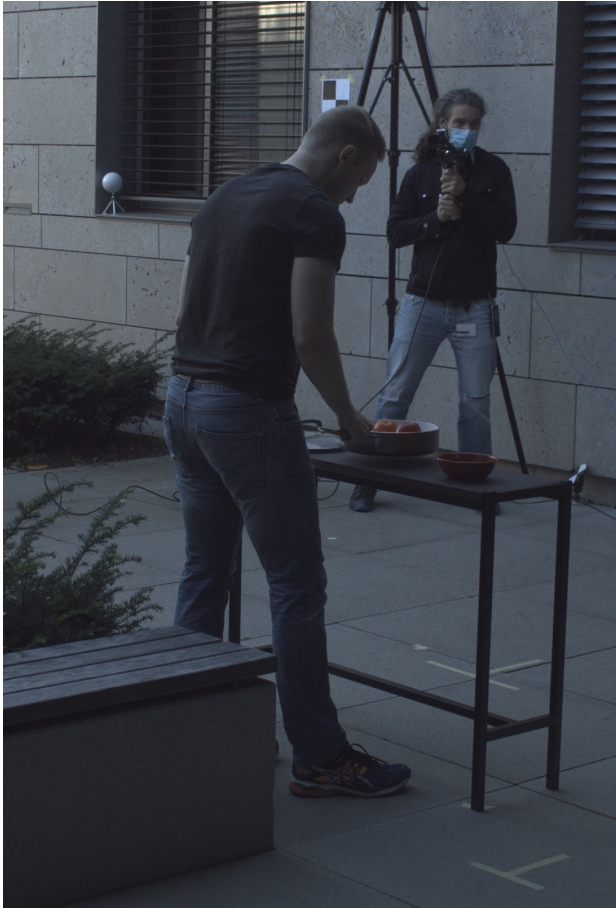

Original

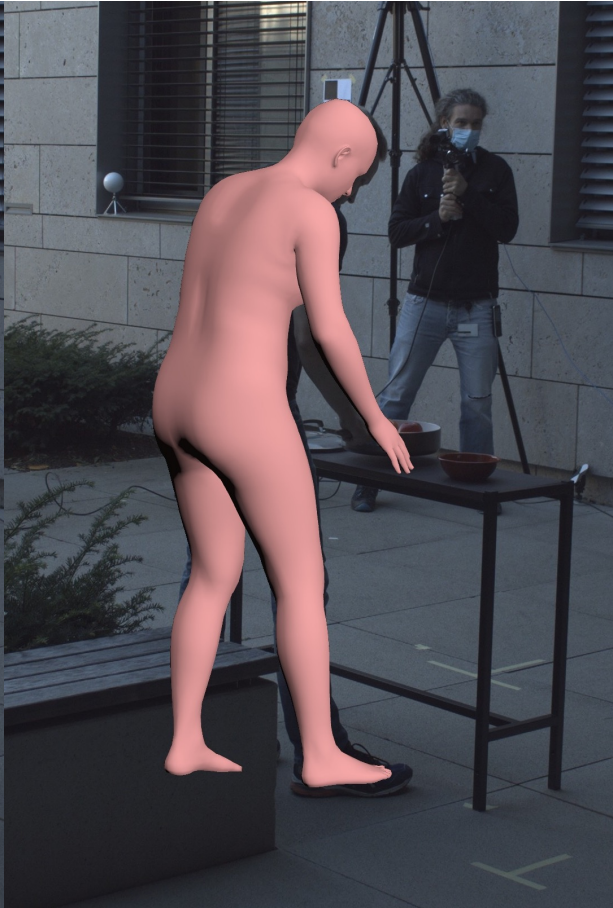

HMR2.0

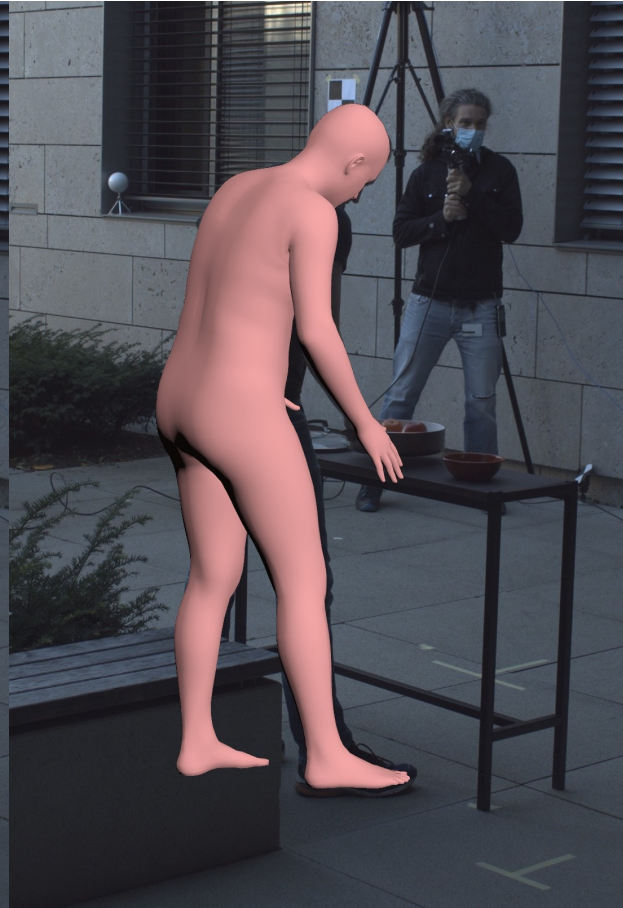

DeforHMR



# (RICH)

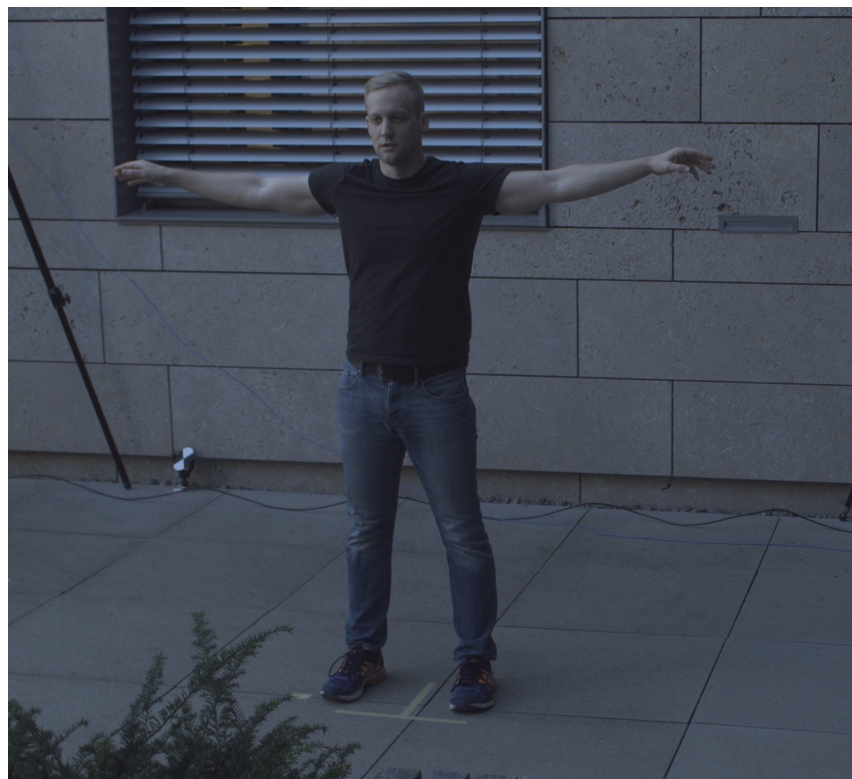

Original

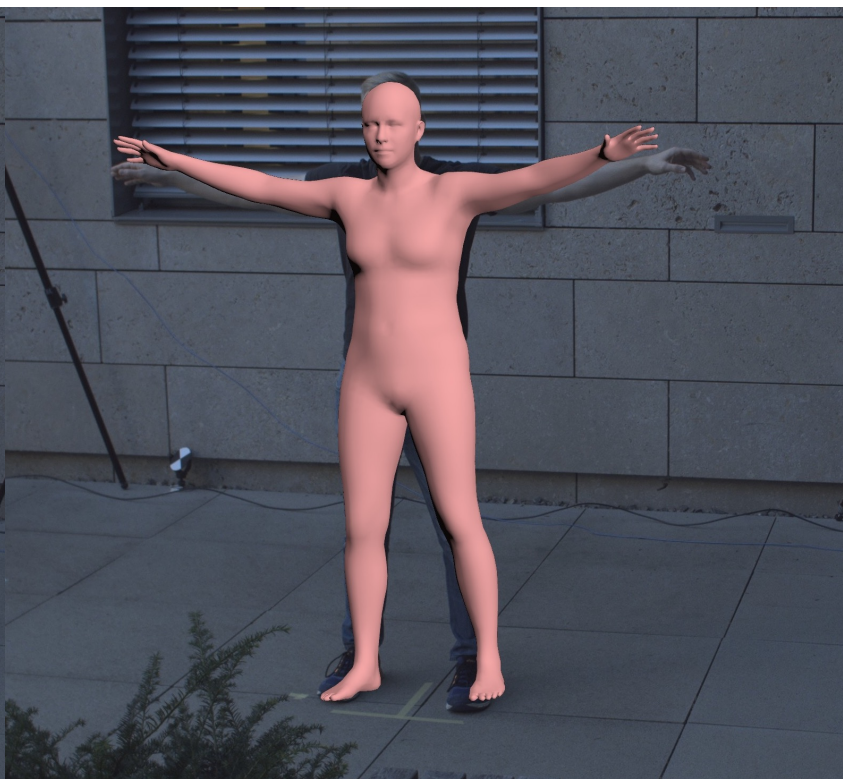

HMR2.0

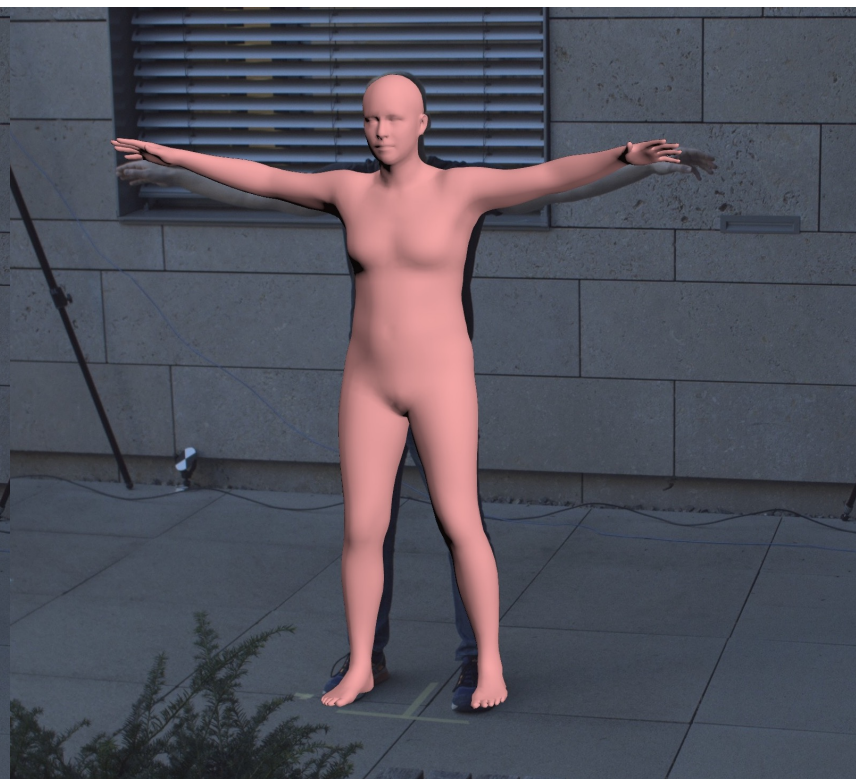

DeforHMR



# (RICH)

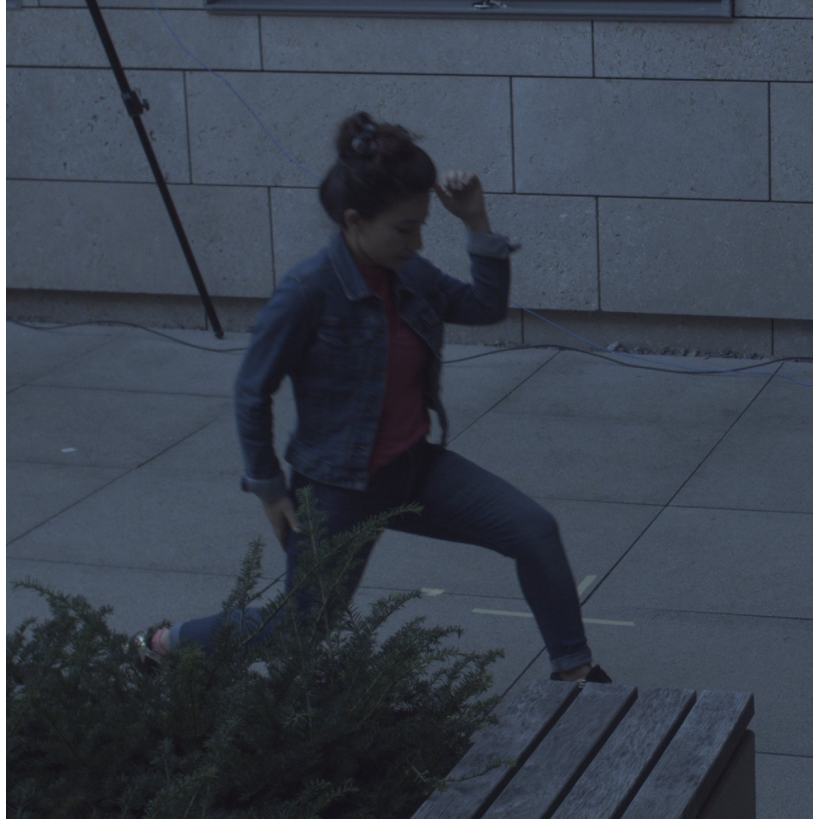

Original

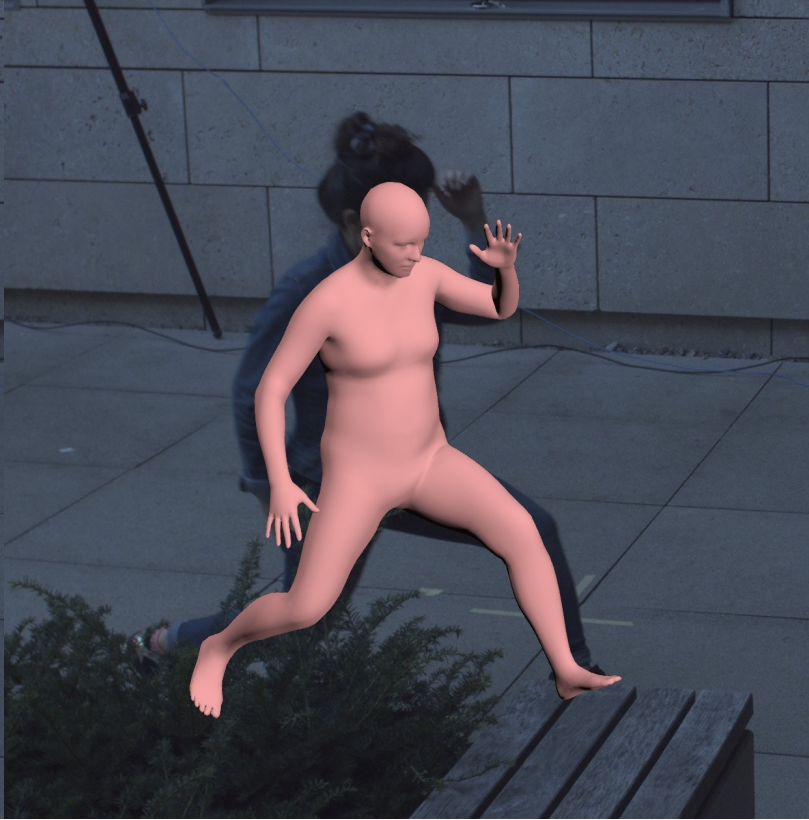

HMR2.0

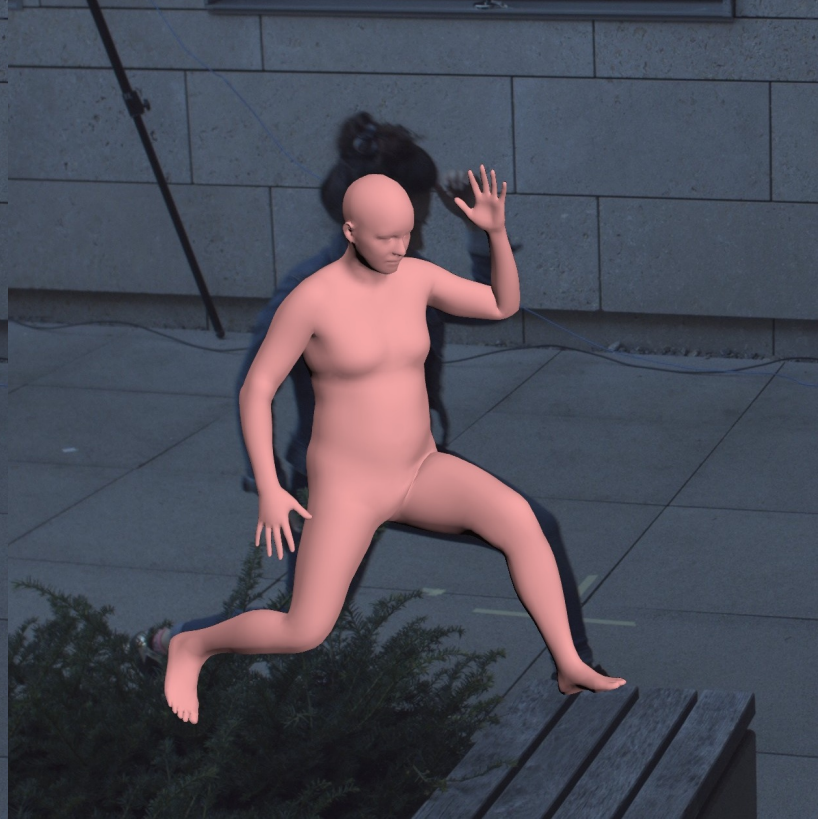

DeforHMR

# (RICH)

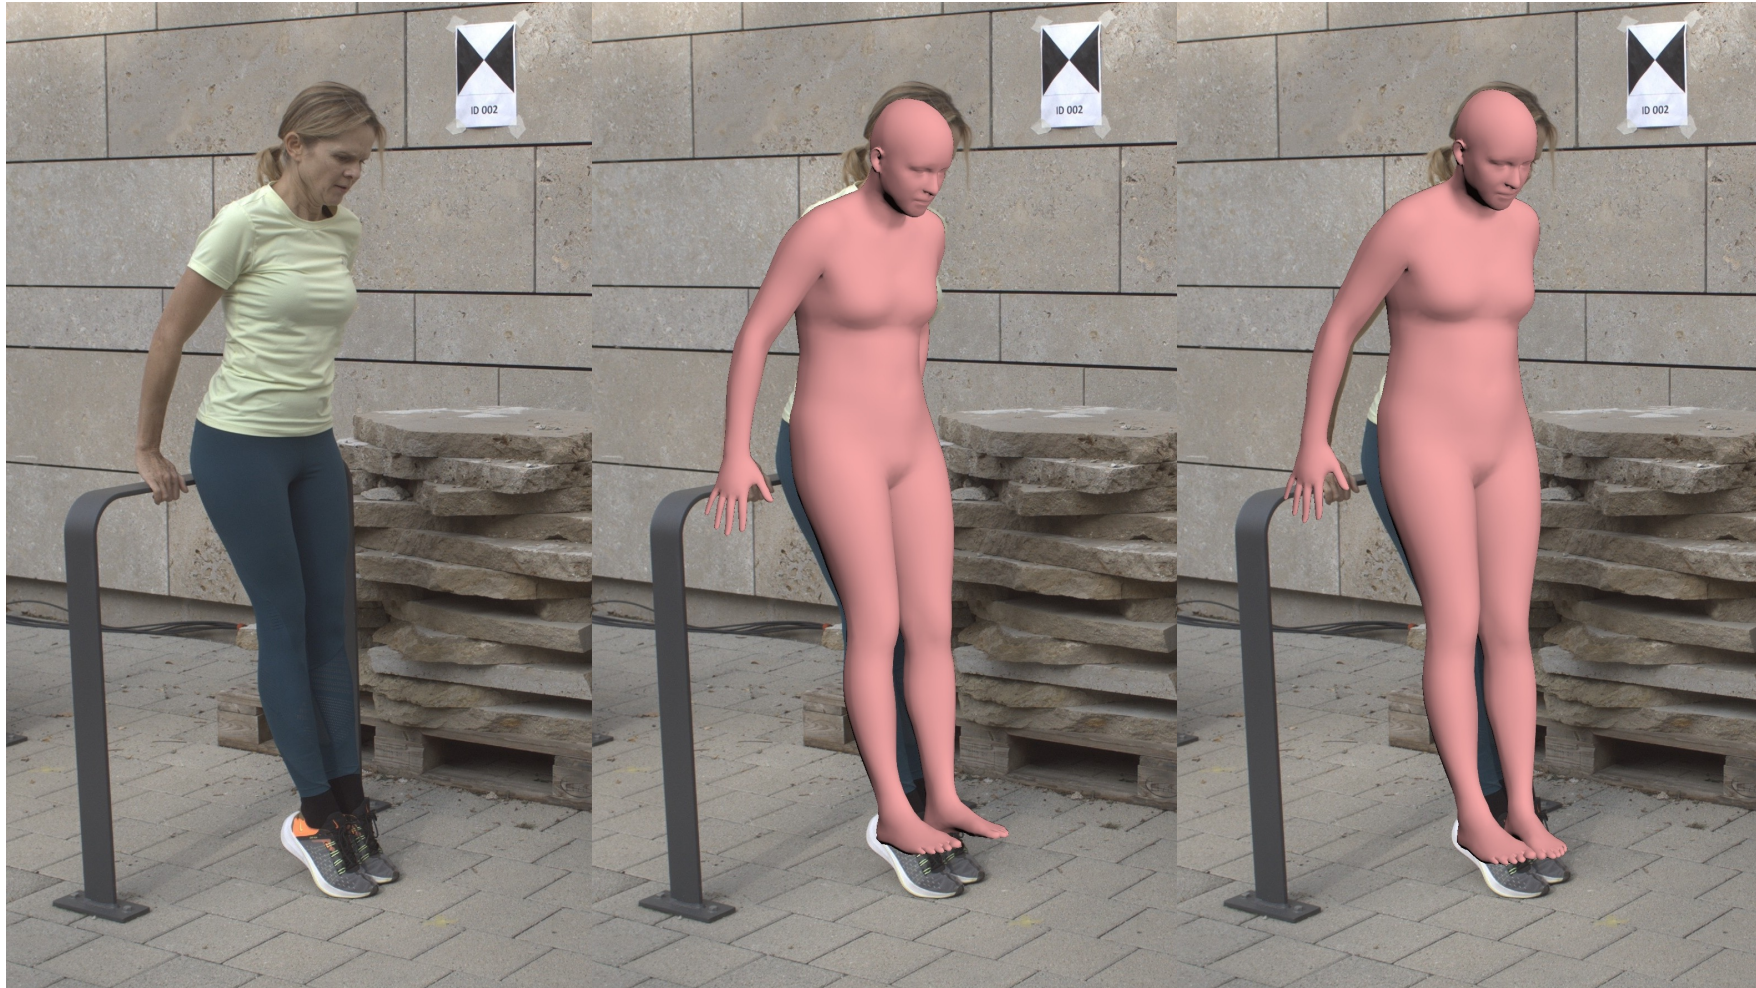

Original

HMR2.0

DeforHMR



# (RICH)

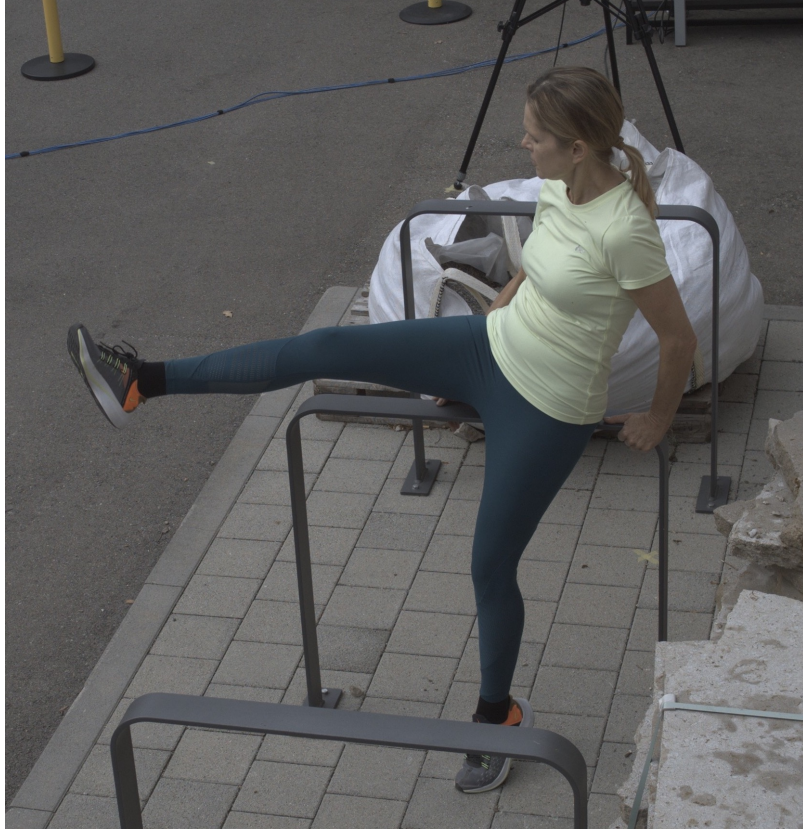

Original

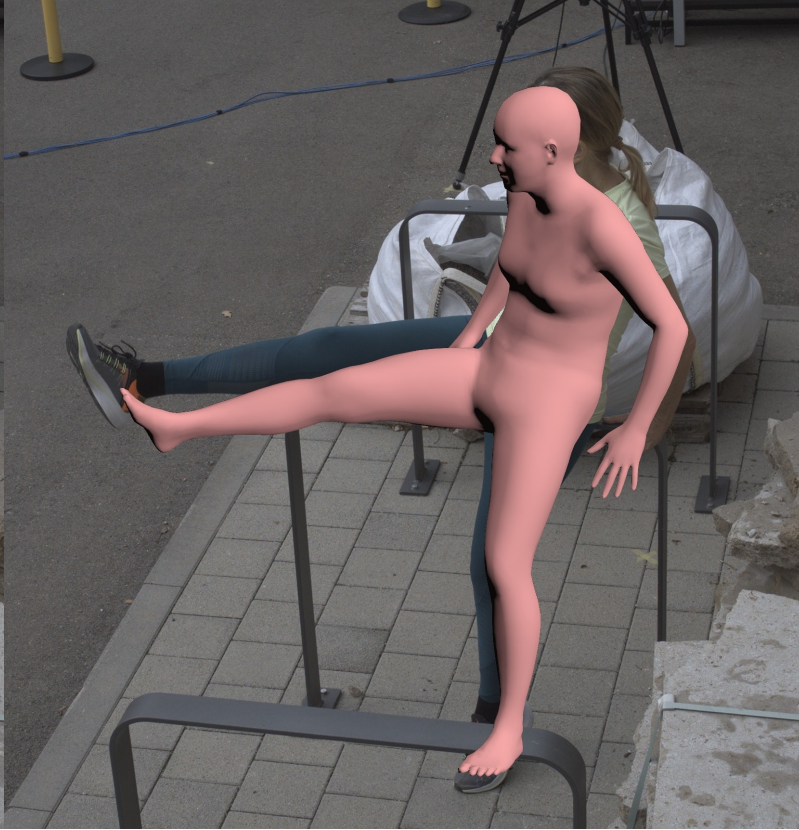

HMR2.0

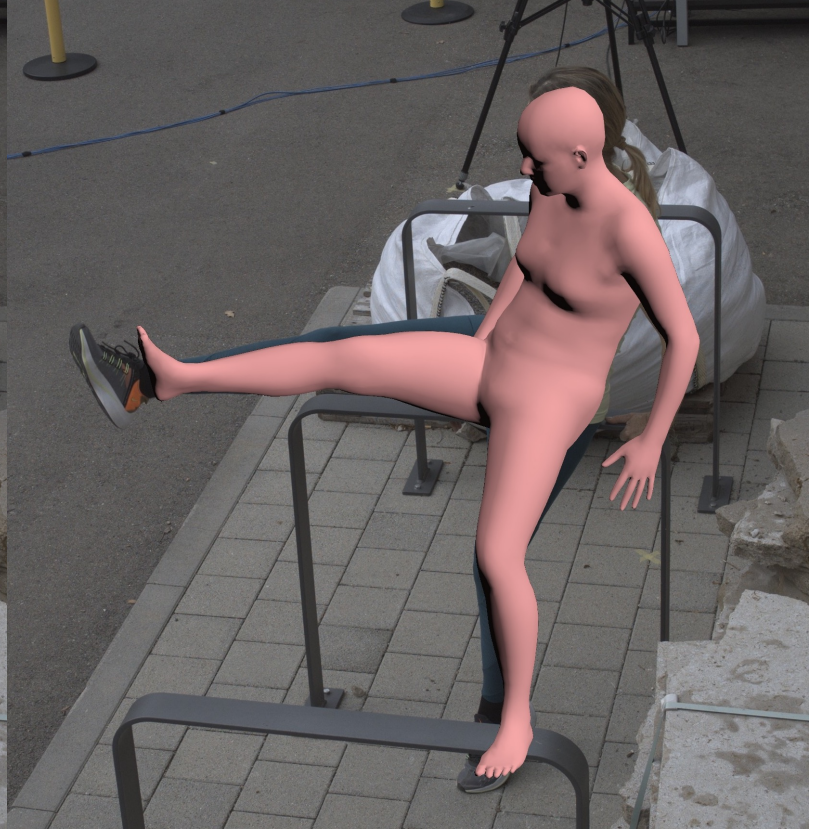

DeforHMR
